# Supplementary material
Source: Springer Nature journal article supplement (https://www.springermedizin.de/resource/supplementary/12883_2006_148_MOESM1_ESM.pdf/9456954)

**A**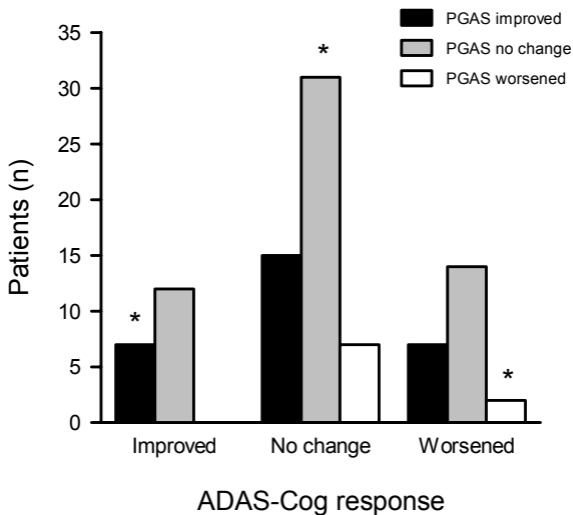**B**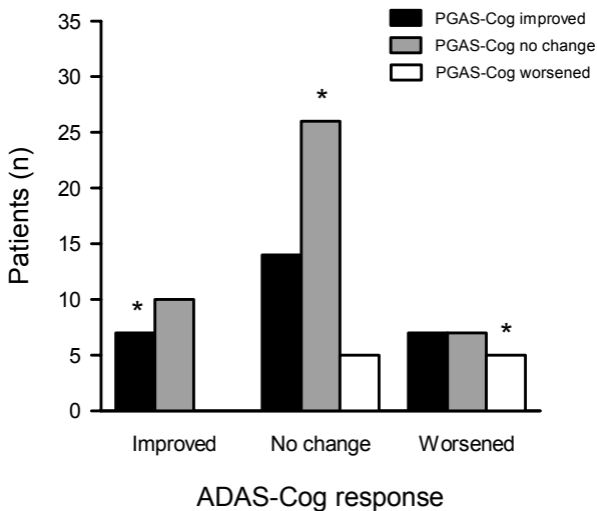

Supplement: MOESM1 [file 9456954]
